# Supplementary material for: Preparation of fluorine-doped, carbon-encapsulated hollow Fe3O4 spheres as an efficient anode material for Li-ion batteries
Source: Royal Society of Chemistry journal article supplement (doi:10.1039/c3nr06409c), 2014-01-01
Supplement: c3nr06409c.pdf [file c3nr06409c.pdf]

# Preparation of Fluorine-Doped, Carbon-Encapsulated Hollow $\text{Fe}_3\text{O}_4$ Spheres as Efficient Anode Material for Li-ion Battery

Hongbo Geng,<sup>1,2</sup> Qun Zhou,<sup>1</sup> Yue Pan,<sup>1</sup> Hongwei Gu,<sup>1\*</sup> Junwei Zheng<sup>2\*</sup>

<sup>1</sup>Key Laboratory of Organic Synthesis of Jiangsu Province, College of Chemical, Chemical Engineering and Materials Science, Soochow University, Suzhou, China, 215123; <sup>2</sup>Institute of Chemical Power Sources, Soochow University, Suzhou, China, 215123;

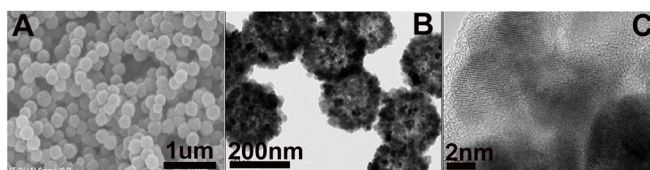

Figure S1. SEM image of the  $h\text{-Fe}_3\text{O}_4@\text{C}$  (A). TEM image of the  $h\text{-Fe}_3\text{O}_4@\text{C}$  (B).  
HRTEM image of the  $h\text{-Fe}_3\text{O}_4@\text{C}$  (C)

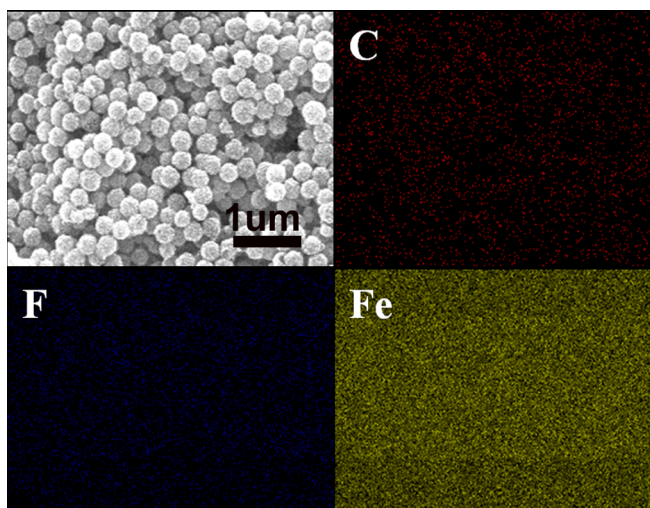

Figure S2. The energy-dispersive X-ray spectroscopy (EDX) elemental mapping of C, F and Fe  
in the  $h\text{-Fe}_3\text{O}_4@\text{C}/\text{F}$  composite

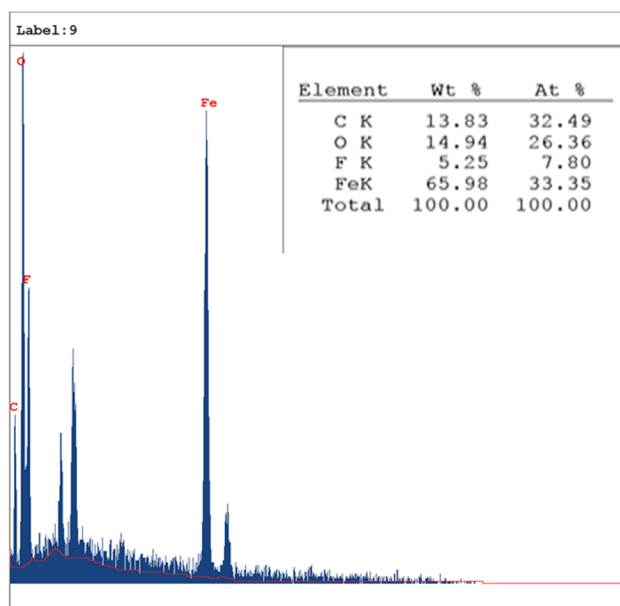

Figure S3. The energy-dispersive X-ray spectroscopy (EDX) spectrum of the  $h\text{-Fe}_3\text{O}_4@\text{C}/\text{F}$  composite

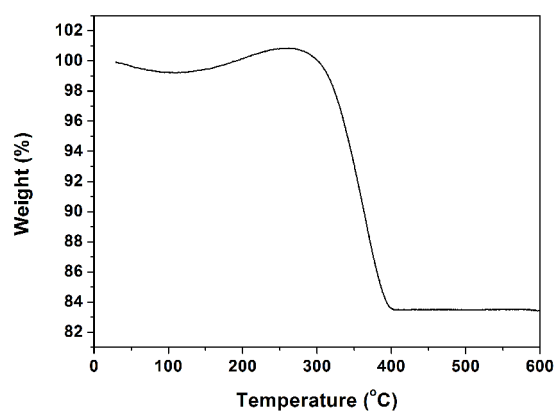

Figure S4. TGA of the  $h\text{-Fe}_3\text{O}_4@\text{C}$  composite

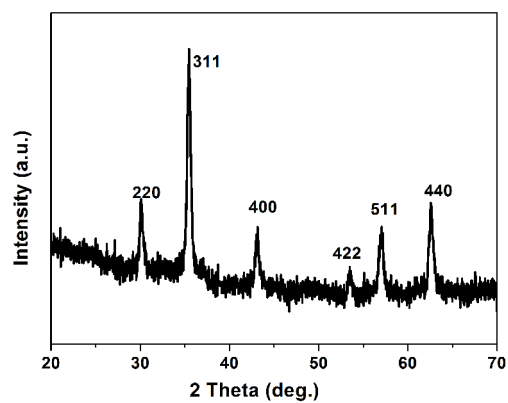

Figure S5. XRD of the  $h\text{-Fe}_3\text{O}_4@\text{C}$  composite

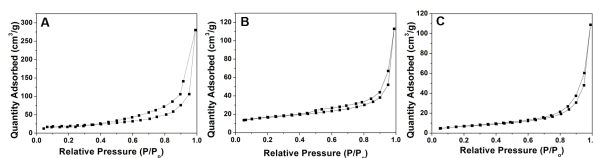

Figure S6. Nitrogen adsorption-desorption isotherm of (A)  $h\text{-Fe}_3\text{O}_4$ , (B)  $h\text{-Fe}_3\text{O}_4@C/F$  and (C)  $h\text{-Fe}_3\text{O}_4@C$ .

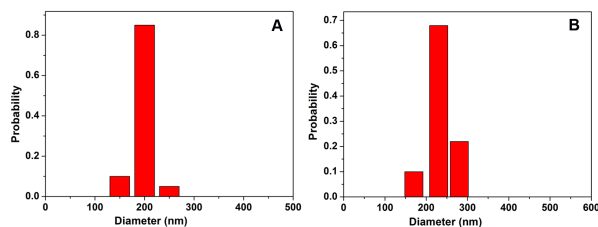

Figure S7. The diameter distributions of the (A)  $h\text{-Fe}_3\text{O}_4$  and (B)  $h\text{-Fe}_3\text{O}_4@C/F$ .

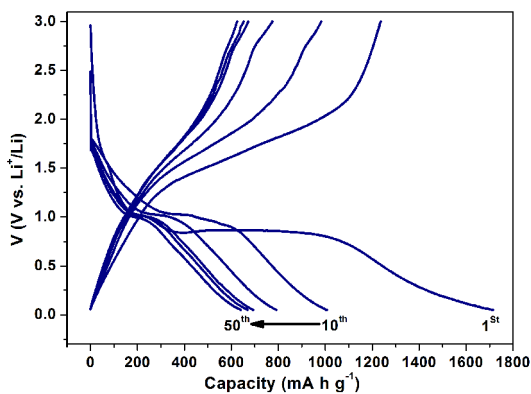

Figure S8. The charge-discharge voltage profiles of the  $h\text{-Fe}_3\text{O}_4@C$  composite

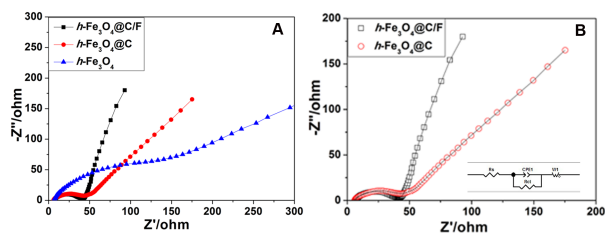

Figure S9. The impedance measures of the  $h\text{-Fe}_3\text{O}_4$ ,  $h\text{-Fe}_3\text{O}_4@C$  and  $h\text{-Fe}_3\text{O}_4@C/F$ .
